# Supplementary material
Source: Research Square preprint supplement (doi:10.21203/rs.3.rs-8548772/v1)
Supplement: Supplementary file 1 [file 95b4806e8e450ade8a5db6cd.docx]

**Supplementary**

**Figure S1:** Symptoms of anxiety among women of reproductive age in Bangladesh

**
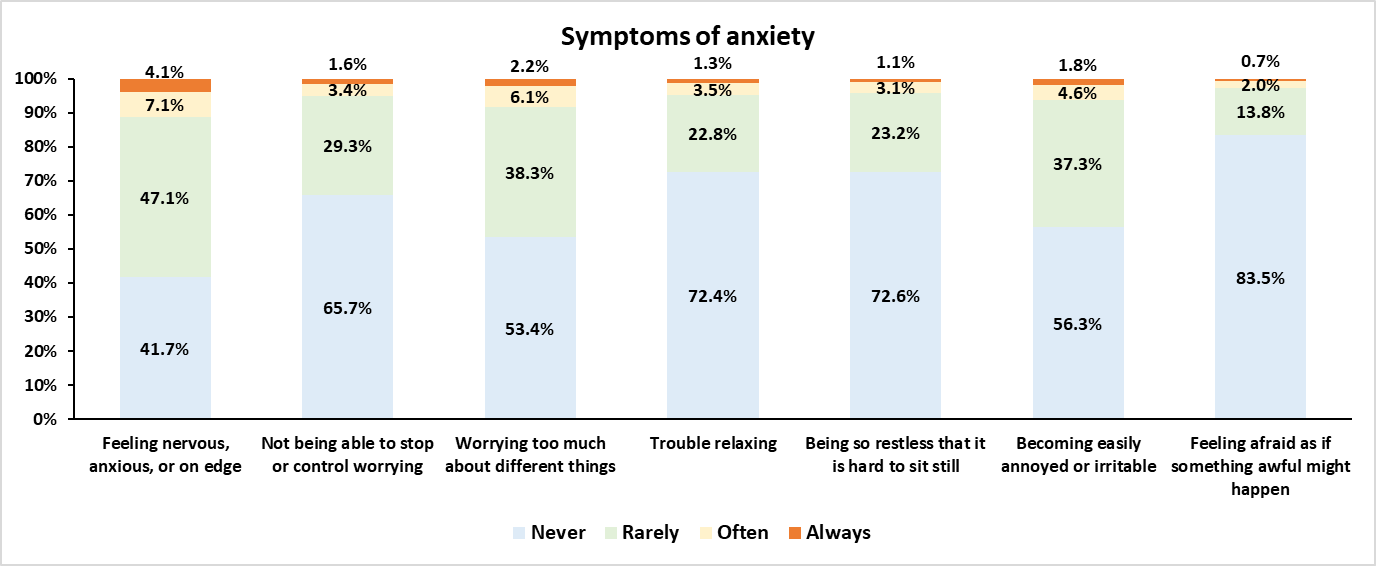
**

**Figure S2:** Symptoms of depression among women of reproductive age in Bangladesh


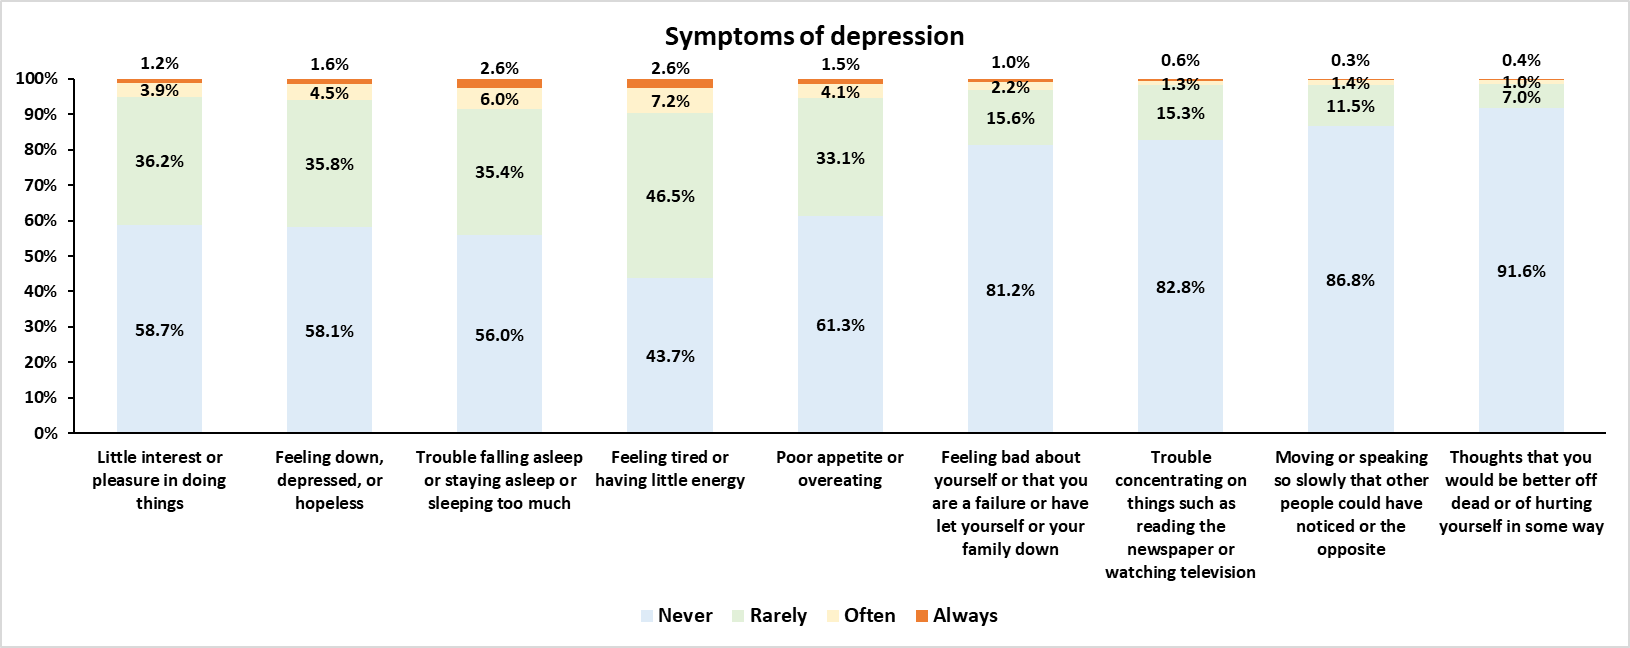


**Figure S3:** Prevalence of women sought care for mental health by level of women’s empowerment


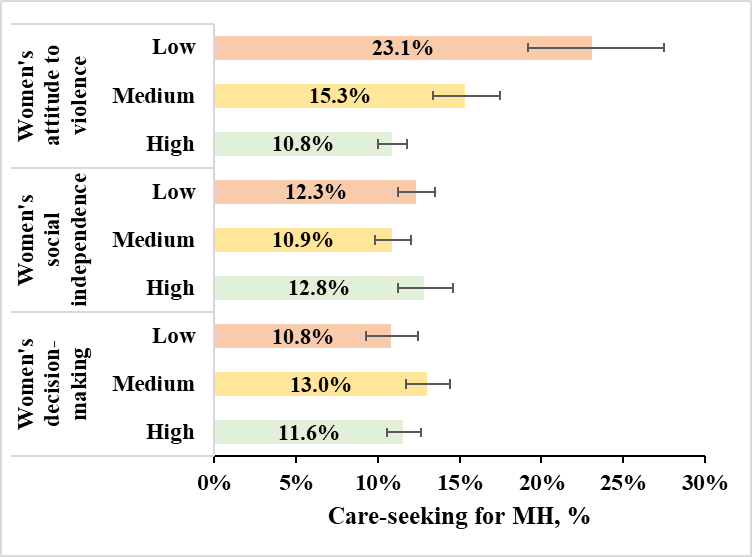


**Table S1:** Prevalence of anxiety, depression and associated care-seeking behaviors by background characteristics

|  | **% Anxiety** | **p-value** | **% Depression** | **p-value** | **% Any MH symptoms** | **p-value** | **% Co-occurrence of MH** | **p-value** | **% care-seeking for MH** | **p-value** |
| --- | --- | --- | --- | --- | --- | --- | --- | --- | --- | --- |
| ***Covariates*** |  |  |  |  |  |  |  |  |  |  |
| **Women's age in years** |  | 0.0000 |  | 0.0000 |  | 0.0000 |  | 0.0000 |  | 0.0019 |
| 15-19 | 12.9% |  | 3.7% |  | 15.0% |  | 2.5% |  | 9.1% |  |
| 20-24 | 12.9% |  | 3.2% |  | 14.0% |  | 2.6% |  | 10.1% |  |
| 25-29 | 17.0% |  | 4.6% |  | 18.5% |  | 3.8% |  | 11.6% |  |
| 30-34 | 20.8% |  | 5.2% |  | 22.3% |  | 4.6% |  | 12.2% |  |
| 35-39 | 23.5% |  | 5.4% |  | 25.2% |  | 4.8% |  | 13.2% |  |
| 40-44 | 23.5% |  | 5.4% |  | 25.5% |  | 4.5% |  | 12.8% |  |
| 45-49 | 25.9% |  | 7.3% |  | 27.9% |  | 6.3% |  | 13.3% |  |
| **Current employment status** |  | 0.0502 |  | 0.5427 |  | 0.0962 |  | 0.2994 |  | 0.0000 |
| No | 19.0% |  | 4.8% |  | 20.7% |  | 4.0% |  | 10.9% |  |
| Yes | 20.6% |  | 5.1% |  | 22.1% |  | 4.4% |  | 13.9% |  |
| **Media exposure** |  | 0.0124 |  | 0.7949 |  | 0.0444 |  | 0.5634 |  | 0.0162 |
| No | 20.6% |  | 4.9% |  | 22.1% |  | 4.3% |  | 11.0% |  |
| Yes | 18.6% |  | 5.0% |  | 20.4% |  | 4.1% |  | 12.6% |  |
| **Wealth index** |  | 0.0000 |  | 0.0602 |  | 0.0000 |  | 0.0558 |  | 0.3986 |
| Poorest | 22.3% |  | 5.6% |  | 23.9% |  | 4.8% |  | 10.9% |  |
| Poorer | 21.6% |  | 5.1% |  | 23.2% |  | 4.3% |  | 11.4% |  |
| Middle | 19.1% |  | 5.4% |  | 20.8% |  | 4.6% |  | 12.7% |  |
| Richer | 18.9% |  | 4.6% |  | 20.4% |  | 3.9% |  | 12.0% |  |
| Richest | 16.0% |  | 4.0% |  | 17.8% |  | 3.3% |  | 12.3% |  |
| **Residence** |  | 0.0489 |  | 0.1823 |  | 0.0708 |  | 0.1798 |  | 0.2947 |
| Urban | 17.9% |  | 4.4% |  | 19.6% |  | 3.7% |  | 11.2% |  |
| Rural | 20.1% |  | 5.1% |  | 21.7% |  | 4.4% |  | 12.2% |  |
| **Division** |  | 0.0000 |  | 0.0001 |  | 0.0001 |  | 0.0000 |  | 0.0000 |
| Barishal | 18.9% |  | 4.7% |  | 21.4% |  | 3.4% |  | 6.0% |  |
| Chattogram | 21.4% |  | 4.2% |  | 23.1% |  | 3.6% |  | 13.9% |  |
| Dhaka | 16.6% |  | 4.2% |  | 18.3% |  | 3.4% |  | 10.6% |  |
| Khulna | 20.1% |  | 6.5% |  | 21.4% |  | 5.8% |  | 15.3% |  |
| Mymensingh | 17.1% |  | 3.8% |  | 18.9% |  | 2.9% |  | 9.6% |  |
| Rajshahi | 17.8% |  | 3.7% |  | 19.5% |  | 3.0% |  | 13.7% |  |
| Rangpur | 25.6% |  | 7.6% |  | 26.9% |  | 6.7% |  | 12.0% |  |
| Sylhet | 20.3% |  | 6.5% |  | 21.5% |  | 6.2% |  | 9.1% |  |
